# Supplementary material for: An Fe3O4@P4VP@FeCl3 core–shell heterogeneous catalyst for aerobic oxidation of alcohols and benzylic oxidation reaction
Source: Royal Society of Chemistry journal article supplement (doi:10.1039/c7ra09005f), 2017-01-01
Supplement: c7ra09005f1.pdf [file c7ra09005f1.pdf]

## **A Fe<sub>3</sub>O<sub>4</sub>@P4VP@FeCl<sub>3</sub> core-shell heterogeneous catalyst for aerobic oxidation of alcohols and benzylic oxidation reaction**

Ruilian Li,<sup>a</sup> Jian Zhao,<sup>b</sup> Fengxia Yang,<sup>b</sup> Yingchao Zhang,<sup>b</sup> Daniele Ramella,<sup>c</sup> Yu Peng<sup>\*,a</sup> and Yi Luan<sup>\*,b</sup>

<sup>a</sup> Hunan Agricultural University, Hunan, 410128, P.R. China, E-mail: pengy7505@hunau.net, Tel: (0086)731-84617022.

<sup>b</sup> School of Materials Science and Engineering, University of Science and Technology Beijing, 30 Xueyuan Road, Haidian District, Beijing 100083, P. R. China, E-mail: yiluan@ustb.edu.cn.

<sup>c</sup> Temple University-Beury Hall, 1901, N. 13th Street Philadelphia PA 19122, United States.

### **Supporting Information**

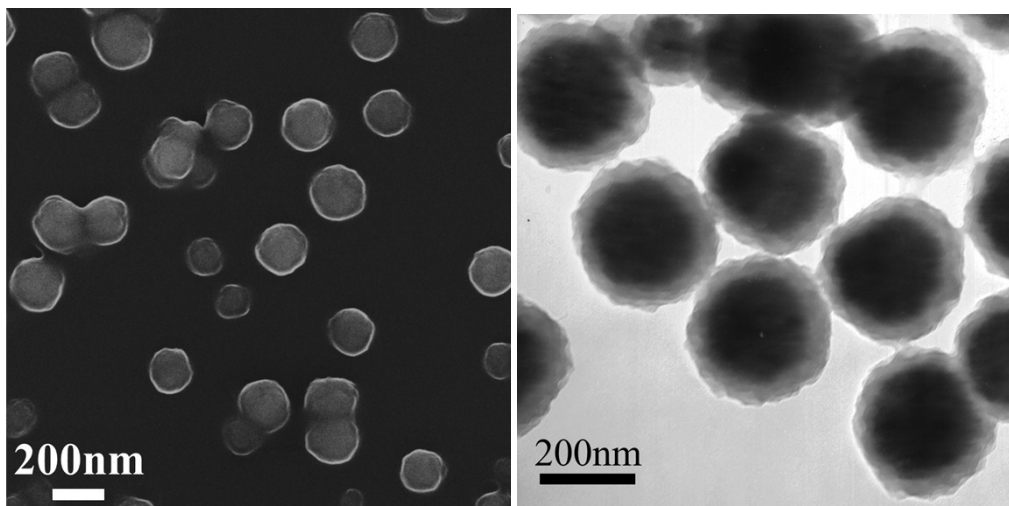

**Fig. S1** SEM and TEM images of recycled  $\text{Fe}_3\text{O}_4@\text{P4VP}@\text{FeCl}_3$  catalyst.

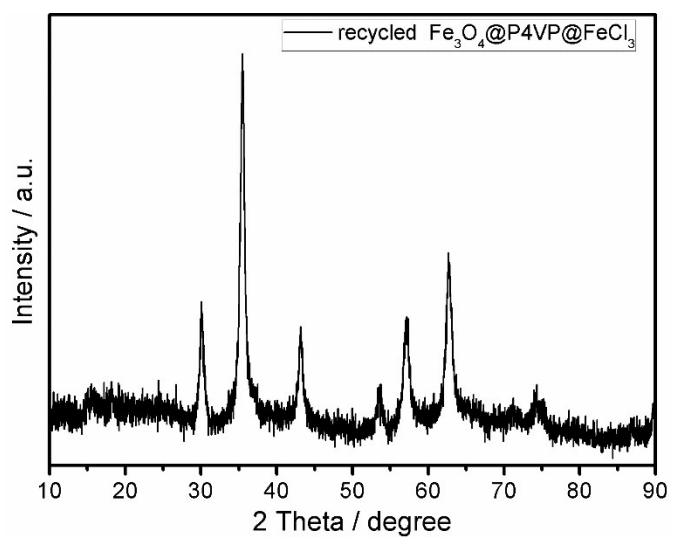

**Fig. S2** XRD of six times recycled  $\text{Fe}_3\text{O}_4@\text{P4VP}@\text{FeCl}_3$  catalyst.

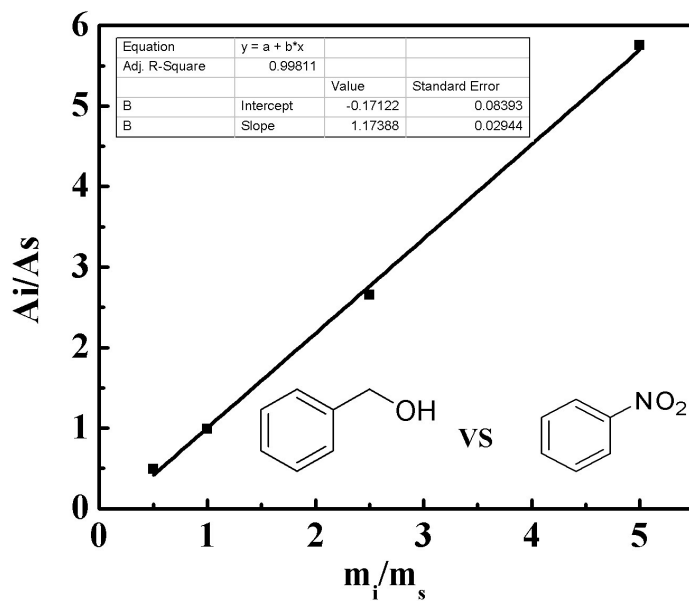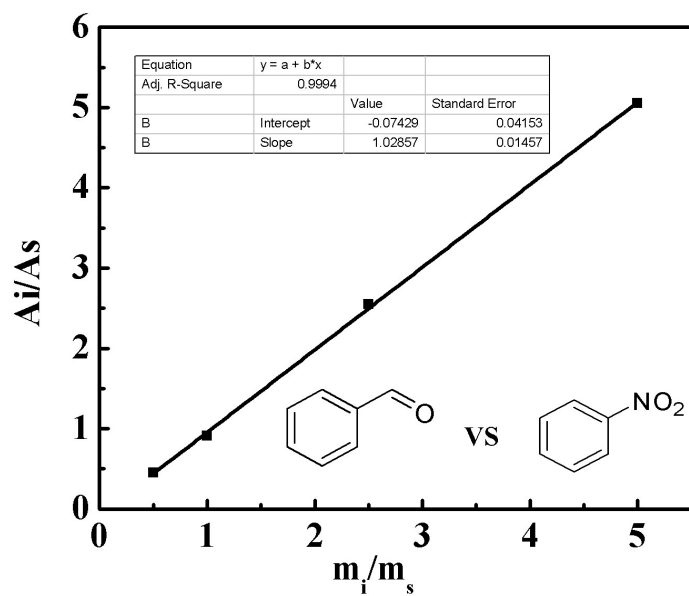

Fig. S3 Compound vs. nitrobenzene internal standard for GC calibration.

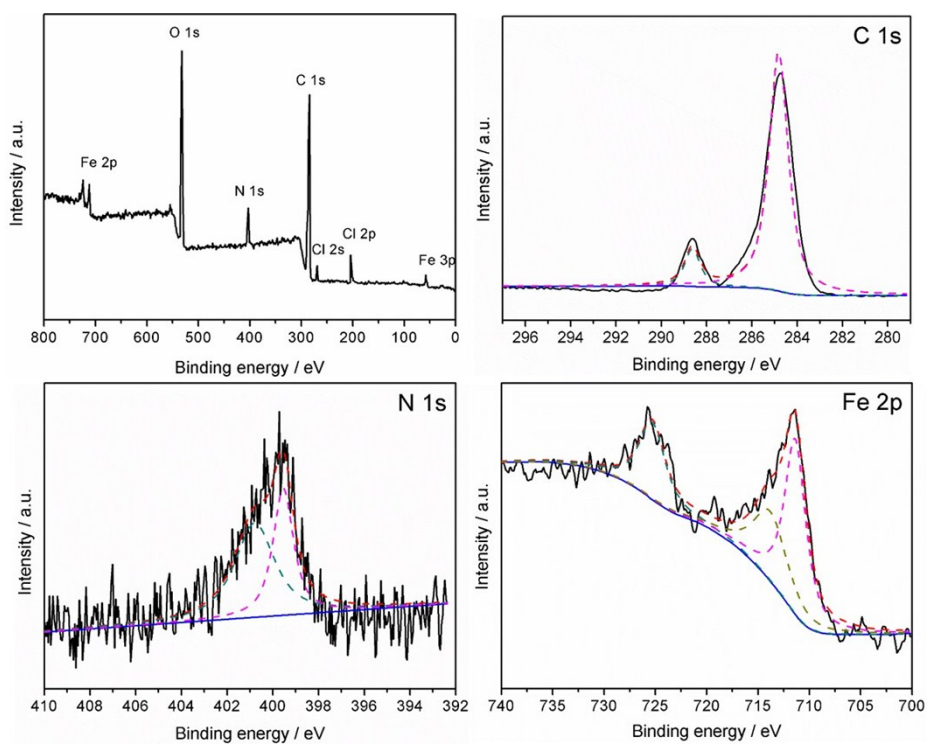

Fig S4. XPS spectrum of recycled  $\text{Fe}_3\text{O}_4@P4VP@FeCl_3$  after five runs of catalysis.
